# Supplementary material
Source: PubMed Central journal article supplement (PMC7176020)

## Supplemental Figure Legends

**Figure S1.** Common and differentially essential genes under ammonia or BafA1 treatments, Related to Figure 1.

- (A) Plot of gene essentiality scores (DepMAP) of v-ATPase subunits.
- (B) Gene scores in untreated versus NH<sub>4</sub>Cl-treated (3mM) KMS26 cells (top). The gene score is the median log<sub>2</sub> fold change in the abundance of all sgRNAs targeting that gene during the culture period. Most genes, as well as non-targeting control sgRNAs, have similar scores in the presence or absence of the treatments. Top 20 genes scoring as differentially required upon ammonium chloride treatment (bottom). Genes associated with iron homeostasis are in purple, central carbon metabolism in blue, and cholesterol synthesis in red.
- (C) Guide score plots for guides targeting *SLC12A9* in NH<sub>4</sub>Cl (top) and BafA1 (bottom) negative genetic screens.
- (D) Fold change in cell number (log<sub>2</sub>) of untreated (gray) or NH<sub>4</sub>Cl (4mM) treated (blue) parental or cells expressing two different guides targeting *SLC12A9* under treatment for 5 days (mean ± SD, n=3).
- (E) Guide score plots for guides targeting *ATP6V0A2* in NH<sub>4</sub>Cl (top) and BafA1 (bottom) negative genetic screens.
- (F) Fold change in cell number (log<sub>2</sub>) of untreated (gray) or BafA1 (3nM) treated (blue) parental or cells expressing two different guides targeting *ATP6V0A2* under treatment for 5 days (mean ± SD, n=3).

**Figure S2.** Under lysosomal dysfunction, cells require cholesterol synthesis and iron import, Related to Figure 2.

- (A) Immunoblot analysis for indicated proteins of SLC11A2 knockout Jurkat cells. GAPDH was used as a loading control.
- (B) NB-598-mediated inhibition of SQLE using a small molecule inhibitor (NB-598) is synthetic lethal with lysosomal pH disruption in HeLa and 293T cell lines. Fold change in cell number (log<sub>2</sub>) of untreated or NB-598 (10μM) treated cells under BafA1(3nM) for 5 days (mean ± SD, n=3, \*\*p<0.05).
- (C) DFO-mediated iron chelation is synthetic lethal with lysosomal pH disruption in mouse KP pancreas, HeLa, and 293T cell lines. Fold change in cell number over 5 days (log<sub>2</sub>) of untreated or DFO (5μM) treated cells under BafA1(3nM). (mean ± SD, n=3, \*\*p<0.05).
- (D) DFO-mediated iron chelation is synthetic lethal with the lysosomotropic drug, Chloroquine. Fold change in cell number over 5 days (log<sub>2</sub>) of untreated or DFO (10μM) treated cells under CQ (20μM) (mean ± SD, n=3, \*\*p<0.05).
- (E) Immunoblotting for the indicated iron sulfur cluster containing proteins in the absence or presence of BafA1 (10nM) and/or free cholesterol supplementation (5μg/ml). GAPDH and Beta-actin are used as a loading controls.

**Figure S3.** Modulating cellular iron enables proliferation under lysosomal dysfunction, Related to Figure 3.

- (A) Cholesterol supplementation does not rescue anti-proliferative effects of Bafilomycin A1. Fold change in cell number (log<sub>2</sub>) of Jurkat cells in the absence and presence of free cholesterol (5μg/ml) after treatment with lipoprotein depleted serum (left) or full serum (right) for 5 days (mean ± SD, n=3, \*\*p<0.05). In the full serum condition, cells were treated with or without BafA1(5nM) for the 5 days.

- (B) Ferrostatin-1 supplementation alone does not rescue anti-proliferative effects of Bafilomycin A1. Fold change in cell number (log<sub>2</sub>) of 293T and mouse pancreas cancer cells cultured in the absence and presence of ferrostatin (1 μM) for 5 days.
- (C) Illustration of relative enrichment of SLC11A2 isoforms 1 or 2 for lysosomal or plasma membranes, respectively.
- (D) In KP pancreas mouse cells, expression of SLC11A2.2 but not SLC11A2.1 is sufficient to rescue high dose BafA1 toxicity corresponding to Figure 3D. Fold change in cell number (log<sub>2</sub>) of untreated or BafA1 treated cells expressing, empty vector or SLC11A2 isoform 1 or isoform 2 (mean ± SD, n=3, \*\*p<0.05).
- (E) In Jurkat cells, expression of SLC11A2 potentiates iron rescue (0.1mg/ml) of BafA1 toxicity (mean ± SD, n=3, \*\*p<0.05).

**Figure S4.** Cellular processes that are affected by iron rescue of lysosomal dysfunction, Related to Figure 4 and Figure 5.

- (A) Heat maps of mean whole cell and lysosomal metabolite abundances of BafA1 treated or combination BafA1 and FAC treated cells corresponding to Figure 4A.
- (B) Immunoblots of pS6K and S6K as a readout of mTOR reactivation following amino acid starvation and feeding under indicated BafA1 concentrations in cells preincubated for 24 hours in the presence or absence of FAC (0.4mg/ml).
- (C) Immunoblotting for the indicated iron response pathway proteins. GAPDH is used as a loading control.
- (D) Pyruvate does not rescue anti-proliferative effects of Bafilomycin A1. Fold change in cell number (log<sub>2</sub>) of Jurkat cells grown in the absence or presence of BafA1 (5nM) and/or pyruvate (2mM) for 5 days (mean ± SD, n=3).
- (E) Blue Native PAGE and immunoblotting for components of Complex I (GRIM19), Complex II (SDHB), or Complex IV (COX4) to measure respective stabilities.

**Figure S5.** Pyruvate derived citrate is essential upon cellular iron depletion, Related to Figure 6.

- (A) Gene scores in untreated versus DFO-treated (2 μM) Jurkat cells (top). The gene score is the median log<sub>2</sub> fold change in the abundance of all sgRNAs targeting that gene during the culture period. Most genes, as well as non-targeting control sgRNAs, have similar scores in the presence or absence of the treatments. Top 20 genes scoring as differentially required upon DFO treatment (bottom). Genes associated with iron homeostasis are in purple and central carbon metabolism in blue.
- (B) Guide score plots for guides targeting *PDHA1* (top) and *PDHB* (bottom) in DFO negative genetic screen.
- (C) Immunoblot analysis for indicated proteins of PDHB knockout Jurkat cells. GAPDH was used as a loading control.
- (D) Fold change in cell number (log<sub>2</sub>) of parental and PDHA1 null Jurkat cells in the absence and presence of BafA1 (3nM) (top) and ammonia (5mM) (bottom) for 5 days (mean ± SD, n=3, \*\*p<0.05).
- (E) Fold change in cell number (log<sub>2</sub>) of parental, PDHB null and SQLE null Jurkat cells grown for 5 days in media containing 10% FBS or 10% lipoprotein depleted serum. (mean ± SD, n=3, \*\*p<0.05).
- (F) Fold change in cell number (log<sub>2</sub>) of parental and PDHB null cells cultured in the absence or presence of Sodium Citrate (10mM) and indicated concentrations of BafA1 grown for 5 days (mean ± SD, n=3, \*\*p<0.05).
- (G) Fractional labeling of citrate, alpha-ketoglutarate, fumarate, and malate from U<sup>13</sup>C-Glucose in wild type and PDHB null Jurkat cells. Related to figure 4C.

(H) Relative metabolite abundance of citrate labeling from U<sup>13</sup>C-Glucose (mean ± SD, n=3, \*\*p<0.05).

**Figure S6.** Characterizing the downstream functions of citrate, Related to Figure 6.

- (A) Cellular ROS levels assessed by flow cytometry measuring CellRox deep red fluorescence. Histogram plots of fluorescence intensity in WT and PDHB\_KO Jurkat cells following 24h BafA1 (10nM) treatment. 30-minute treatment with TBHP (200μM) was used to induce cellular ROS as a positive control.
- (B) Antioxidants supplementation does not rescue PDHB\_KO sensitivity to Bafilomycin A1. Fold change in cell number (log<sub>2</sub>) of Jurkat cells grown in the absence or presence of BafA1 (2nM) and/or antioxidants Ferristatin-1 (1μM), Trolox (100μM), or GSH (1mM) for 5 days (mean ± SD, n=3) (top).
- (C) Fractional labeling of palmitate in WT and PDHB\_KO cells from U<sup>13</sup>C-Glucose.

**Figure S1**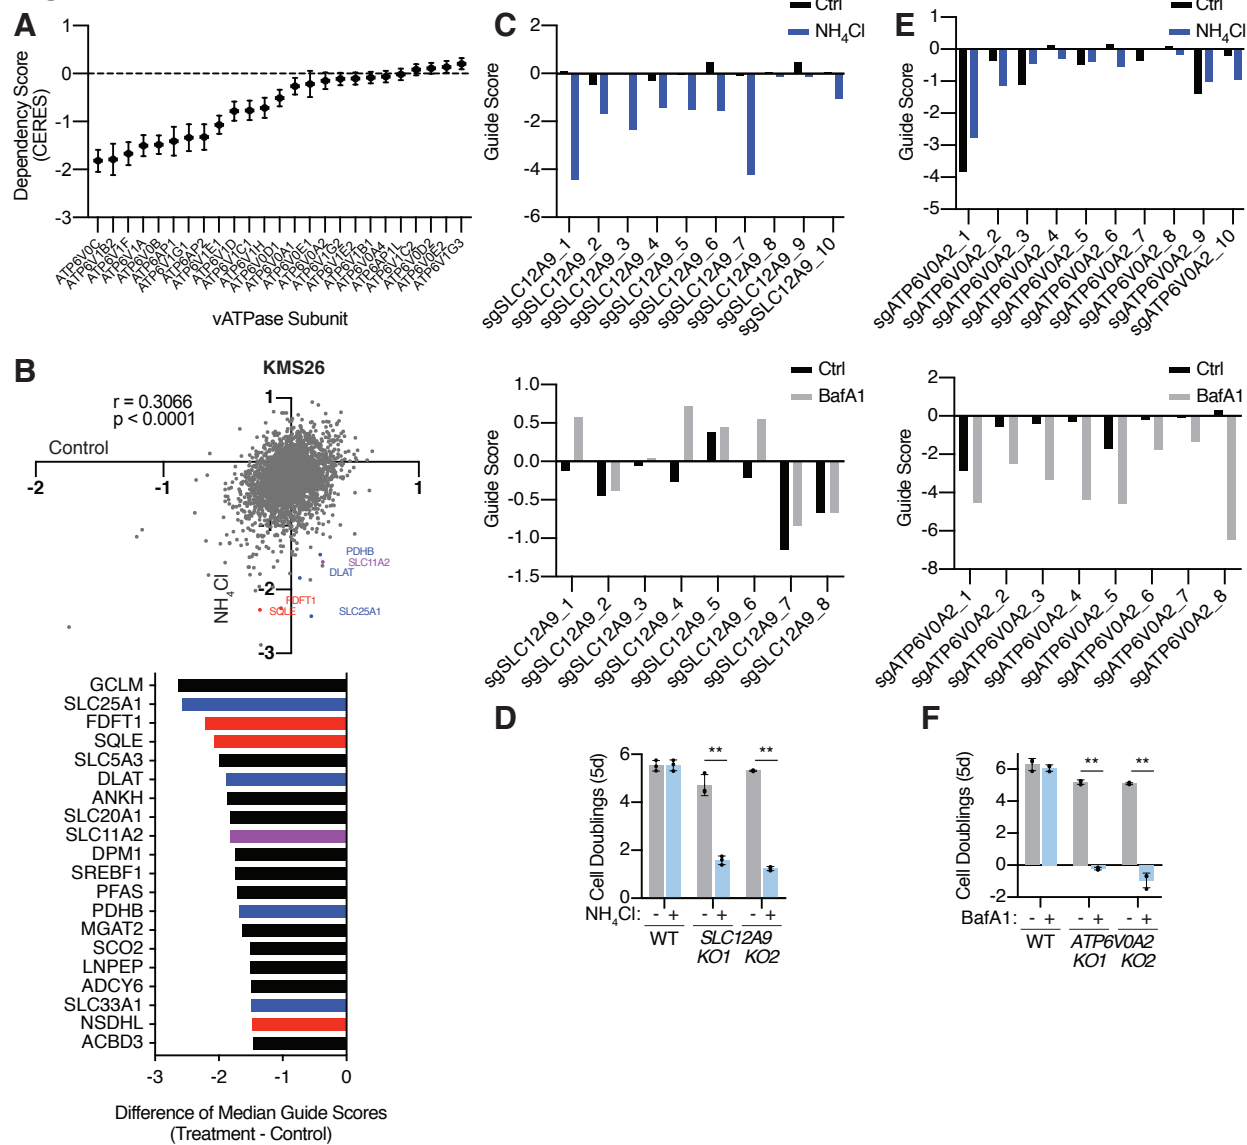





**Figure S3****A**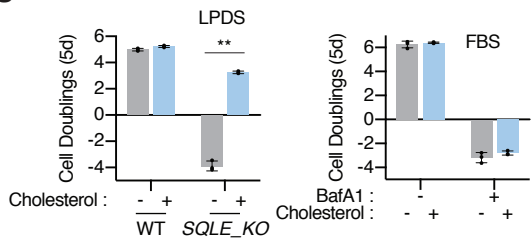**B**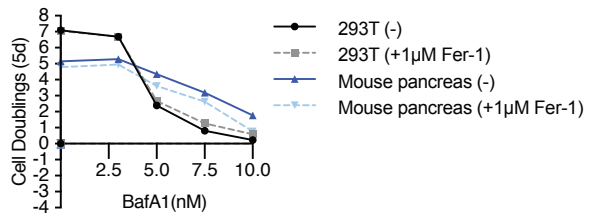**C**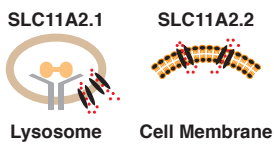**D**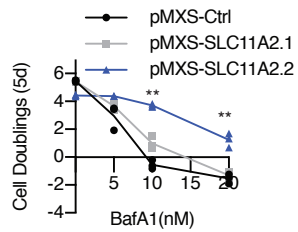**E**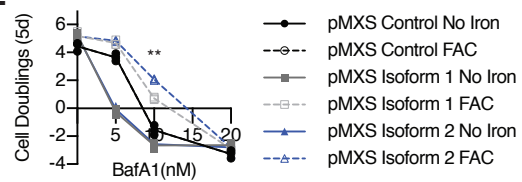

# Figure S4

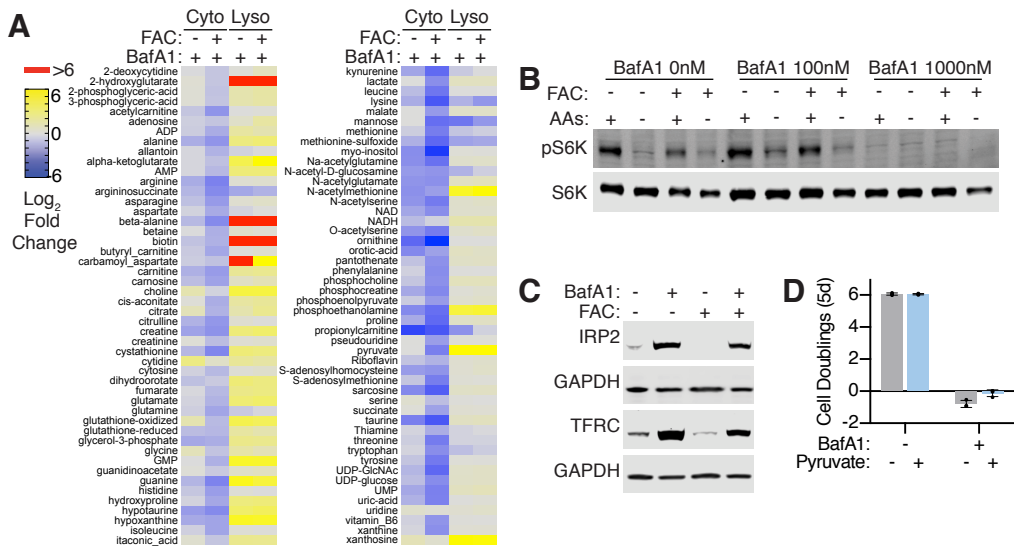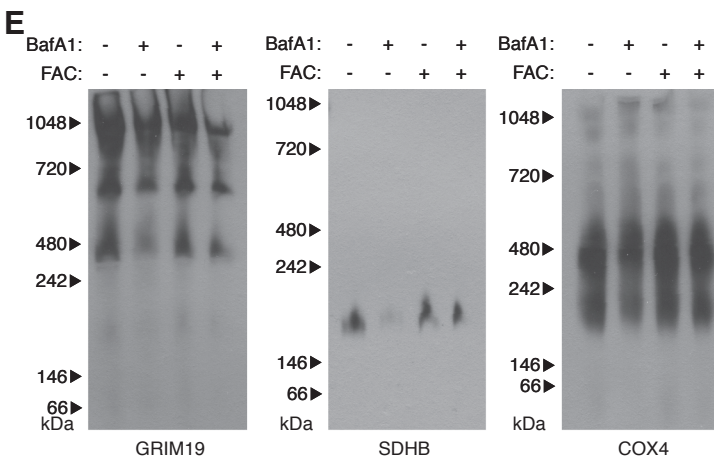

**Figure S5**

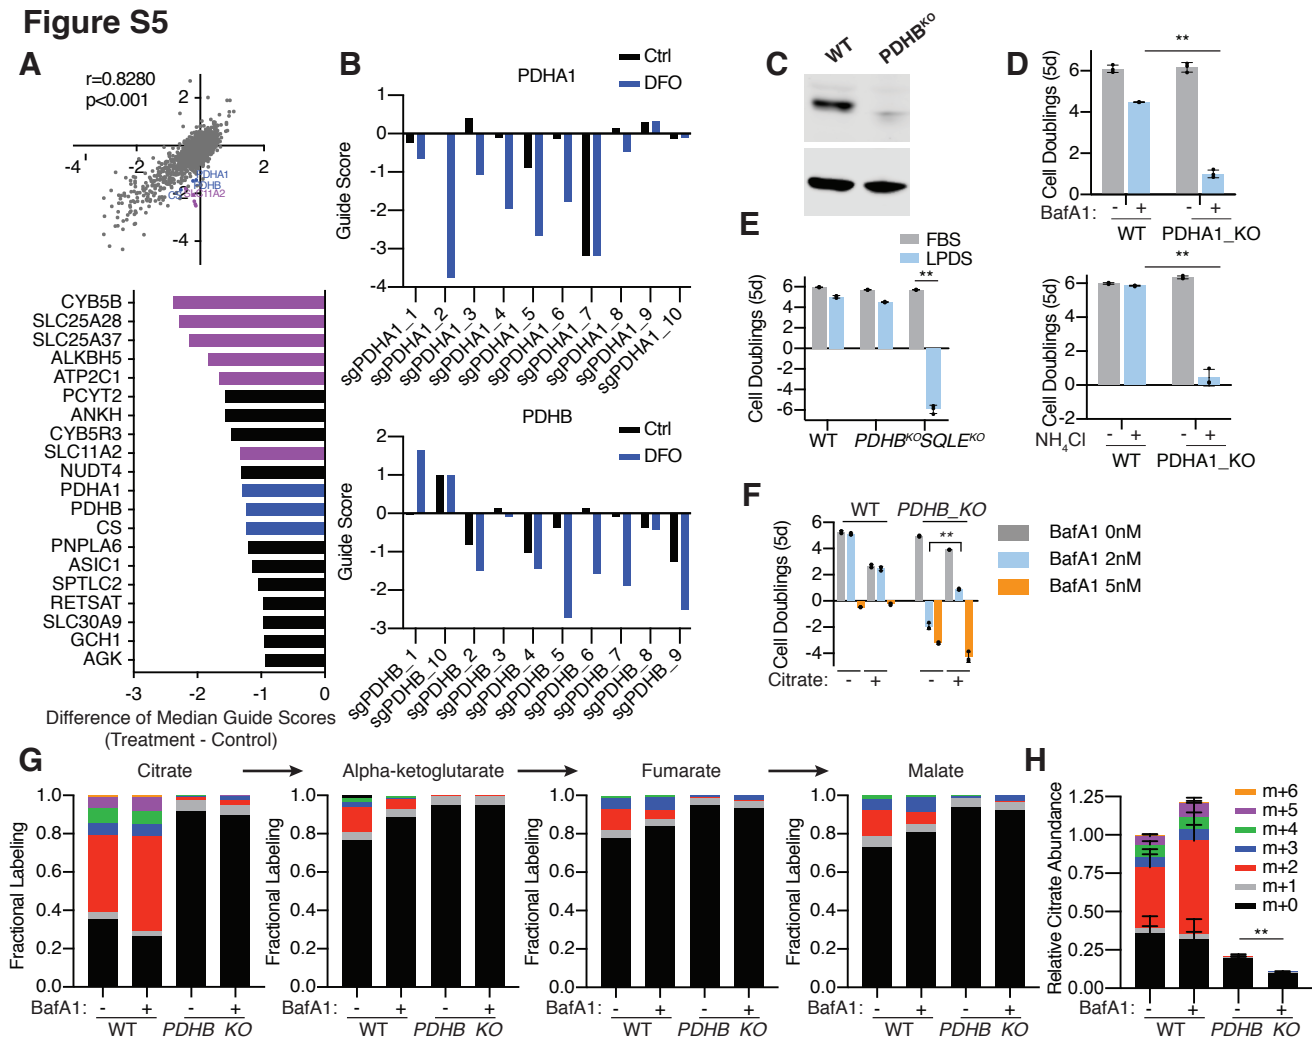

**Figure S6**

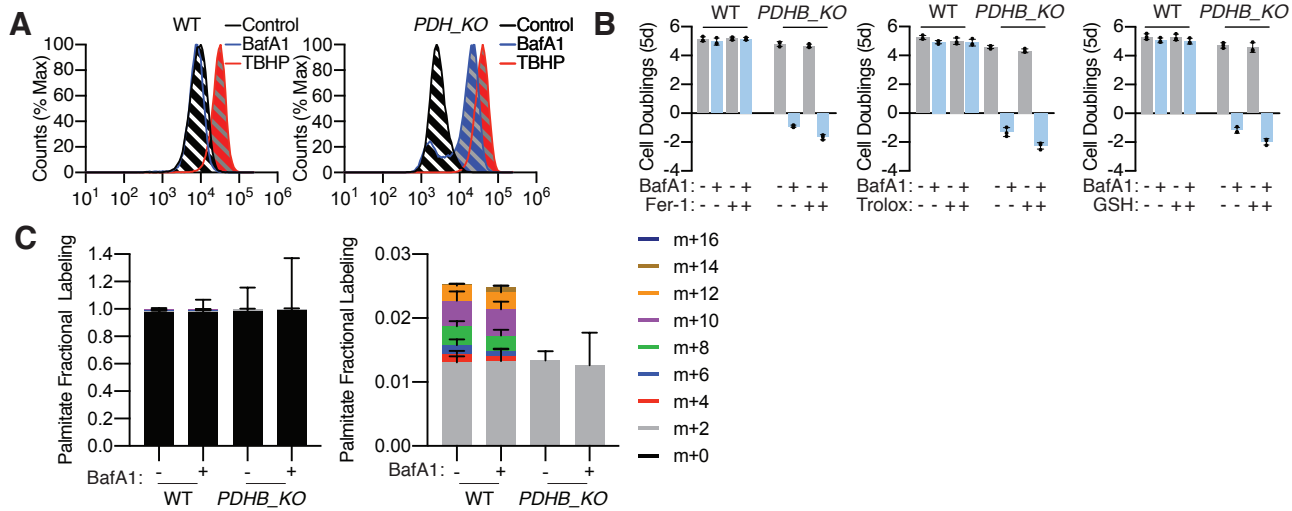

Supplement: NIHMS1569249-supplement-1.pdf [file NIHMS1569249-supplement-1.pdf]
